# Supplementary material for: Mesenchymal Progenitors Derived from Different Locations in Long Bones Display Diverse Characteristics
Source: Hindawi journal article supplement (doi:10.1155/2019/5037578), 2019-04-04
Supplement: f1 [file 5037578.f1.pdf]

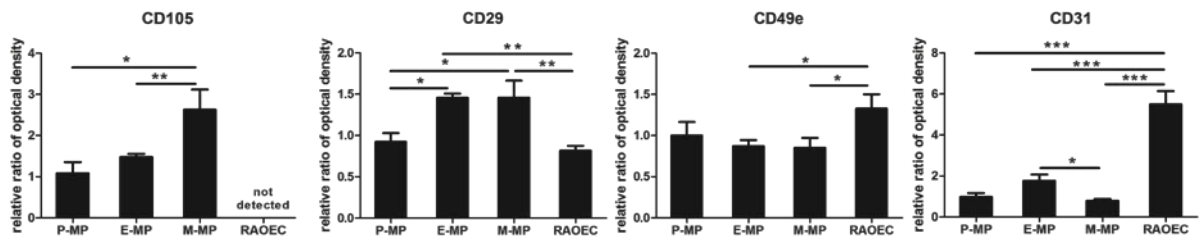

**Figure S1:** The cells derived from different regions of long bones expressed stem cell surface markers, CD105, CD29 and CD49e. The optical densities of bands in Fig.1D were measured, and relative ratios were analyzed. Data shown as mean  $\pm$  SD. \* $p < 0.05$ ; \*\* $p < 0.01$ ; \*\*\* $p < 0.001$ .

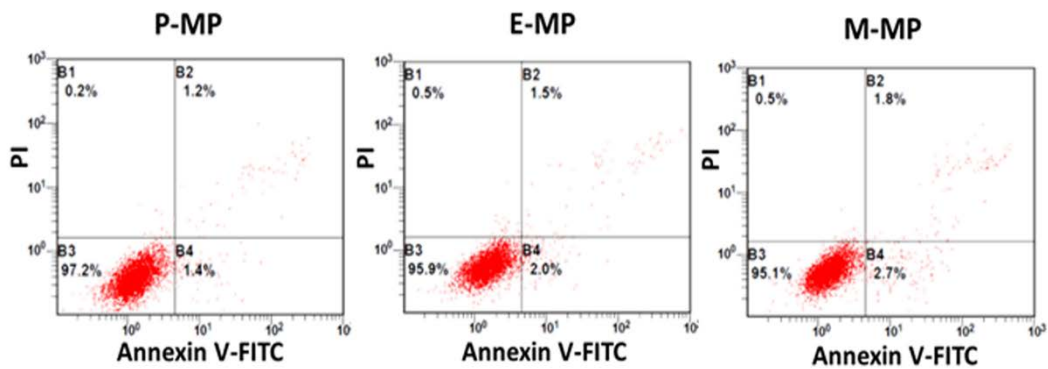

**Figure S2:** No significant differences in apoptosis were displayed between different MP groups. Annexin V-FITC/PI staining were performed to detect cell apoptosis of all three MPs, and the percentages of apoptotic cells were measured by flow cytometry.

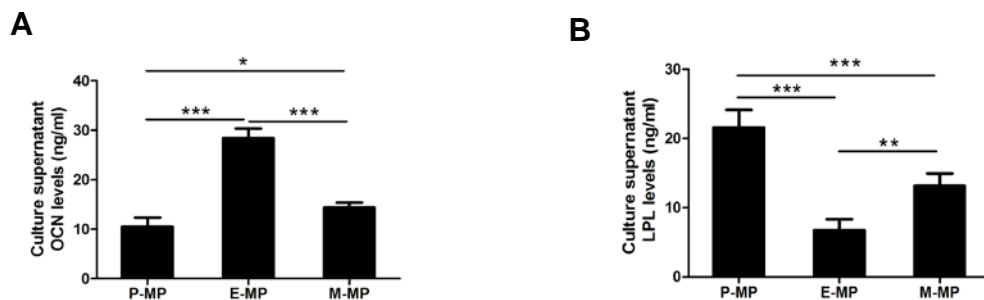

**Figure S3:** OCN and LPL protein levels after bi-directional differentiation were detected. (A). The supernatants of culture media of all three MPs after 21 days osteogenic differentiation were collected to detect OCN protein level, (B). and after 14 days adipogenic differentiation were collected to detect LPL protein level using commercial ELISA kits. Data shown as mean  $\pm$  SD. \* $p < 0.05$ ; \*\* $p < 0.01$ ; \*\*\* $p < 0.001$ .

# Table S1

## Primers' Sequences

| Gene           | Primer sequence                 |
|----------------|---------------------------------|
| $\beta$ -actin | Forward: TCCTGAGCGCAAGTACTCTGTG |
|                | Reverse: CGGACTCATCGTACTCCTGCTT |
| CD105          | Forward: CTGGTCATTACCCTGCTGTTG  |
|                | Reverse: GAGAACGTGGACTTCATGCG   |
| CD29           | Forward: CAATGAGGGTCGTGTTGGGA   |
|                | Reverse: CCGTTGGACCTATCGCAGTT   |
| CD49e          | Forward: ATGCCCTGAAGCCAAGTGTT   |
|                | Reverse: GAAGGCTGAACGGCTGGTAT   |
| CD31           | Forward: CCAGGCCGAAGCTAGAACTC   |
|                | Reverse: GGGTTTGGAGAGCATTTCGC   |
| TRAP           | Forward: GTGTGGGCTATGTGCTGAGT   |
|                | Reverse: TCCACGTATGTGAAGCCACC   |
| ATP6V0D2       | Forward: GTTAGCCCAAGCCGAAGACT   |
|                | Reverse: CTACGGCGTCAAACAAAGGC   |
| MMP9           | Forward: GATCCCCAGAGCGTTACTCG   |
|                | Reverse: GTTGTGGAAACTCACACGCC   |
| RANKL          | Forward: ACAGGTTTGCAGGACTCGAC   |
|                | Reverse: AACTCCTGAGAAGCGCTGTG   |
| OPG            | Forward: TGCTCCTGGCACCTACCTAA   |
|                | Reverse: TAGCGCCCTTCCTCACATTC   |
| IL-6           | Forward: CTGGTCTTCTGGAGTTCCGT   |
|                | Reverse: TCTTGGTCCTTAGCCACTCCT  |

The primer sequences of *Runx2*, *OSX*, *OCN*, *C/EBP- $\alpha$* , *PPAR- $\gamma$*  and *LPL* are as described [27].
